# Supplementary material
Source: Springer Nature journal article supplement (https://www.springermedizin.de/resource/supplementary/12935_2011_320_MOESM8_ESM.pdf/9540326)

**A**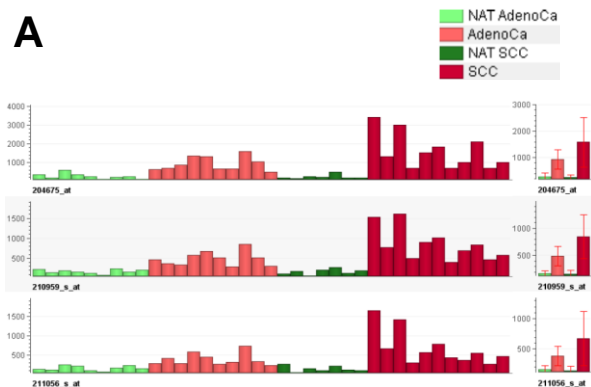**B**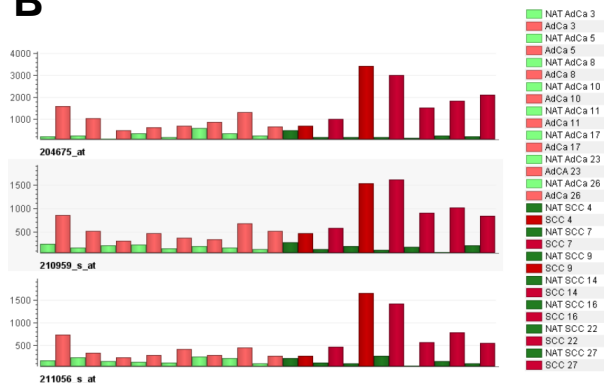**C**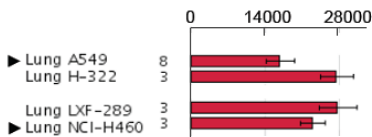

Supplement: MOESM8 [file 9540326]
